# Supplementary material for: BNIP3-mediated mitophagy boosts the competitive growth of Lenvatinib-resistant cells via energy metabolism reprogramming in HCC
Source: PubMed Central journal article supplement (PMC11226677; doi:10.1038/s41419-024-06870-9), 2024-07-05

# Supplemental Figure 8

Full and Uncropped western blot for Supplemental Fig. S1C

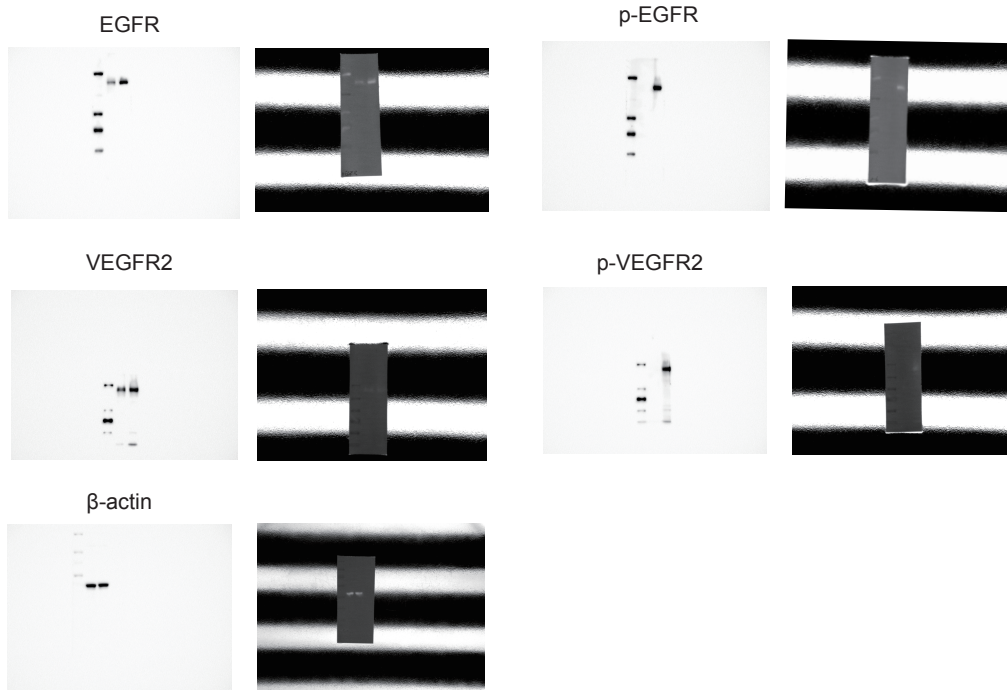

Full and Uncropped western blot for Fig. 2M

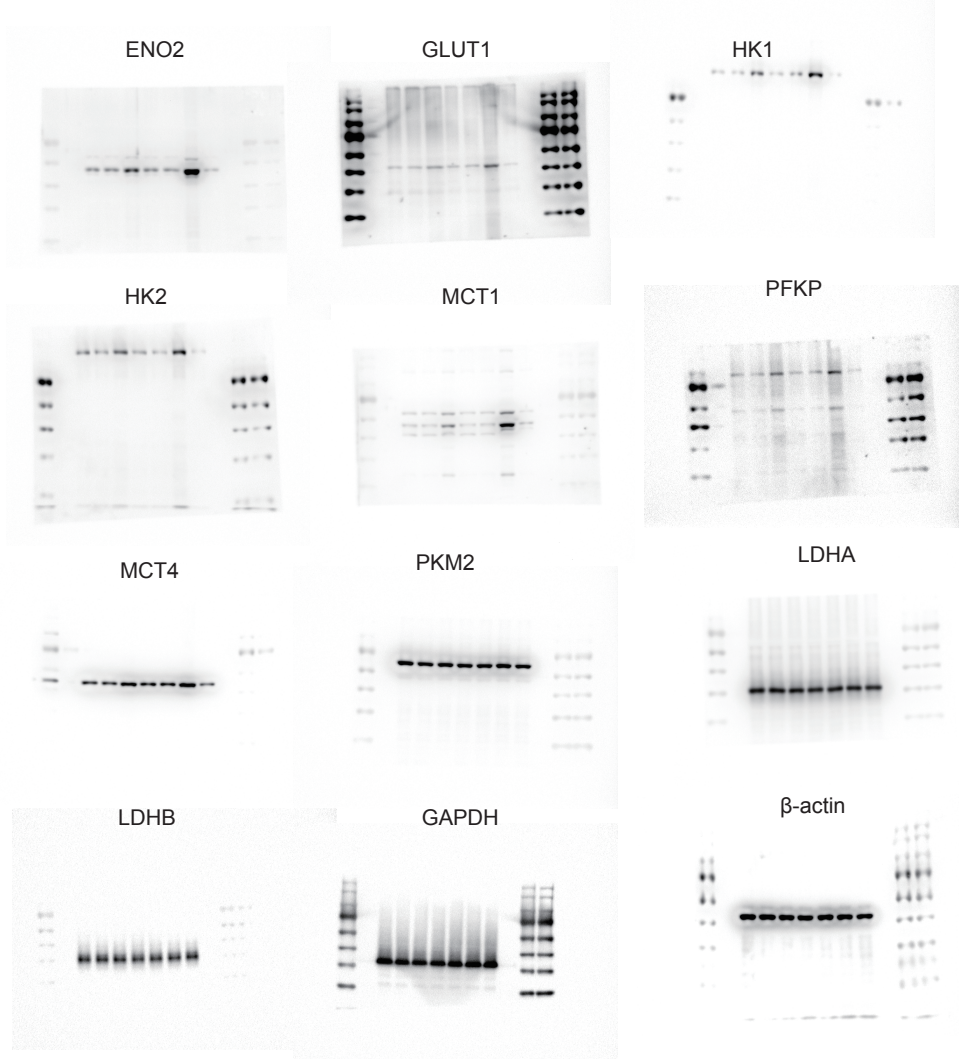

**Full and Uncropped western blot for Supplemental Fig. S3M**

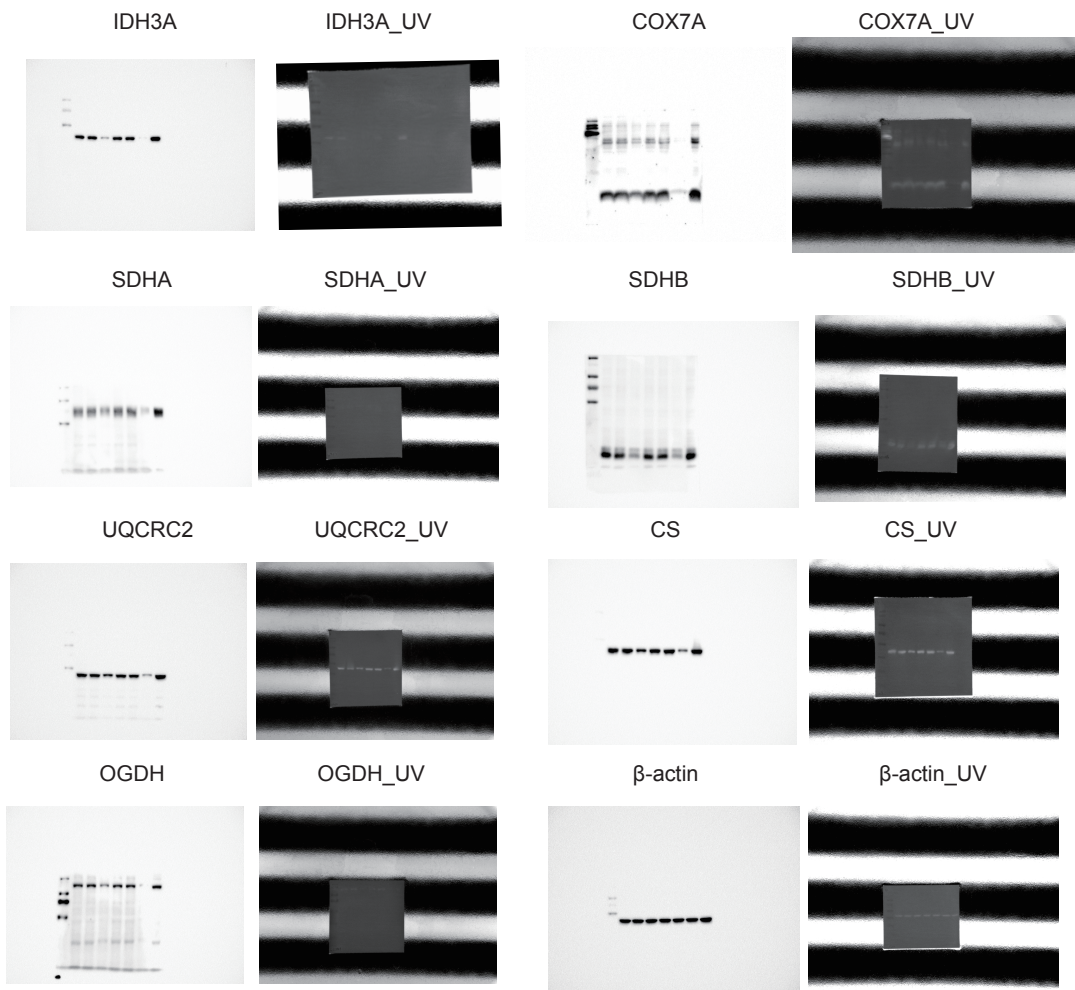

Full and Uncropped western blot for Fig. 4C

BNIP3

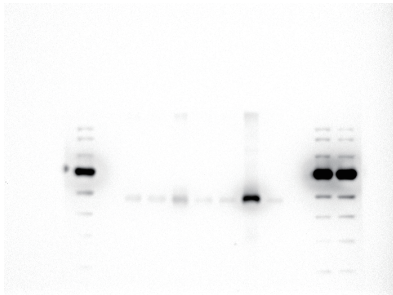

TOMM20

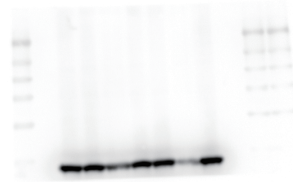

LC3B

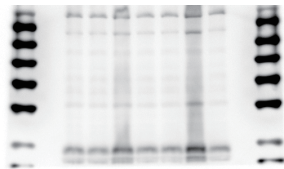

$\beta$ -actin

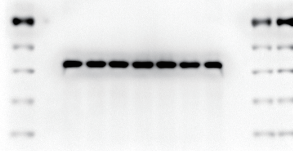



Full and Uncropped western blot for Fig. 4F

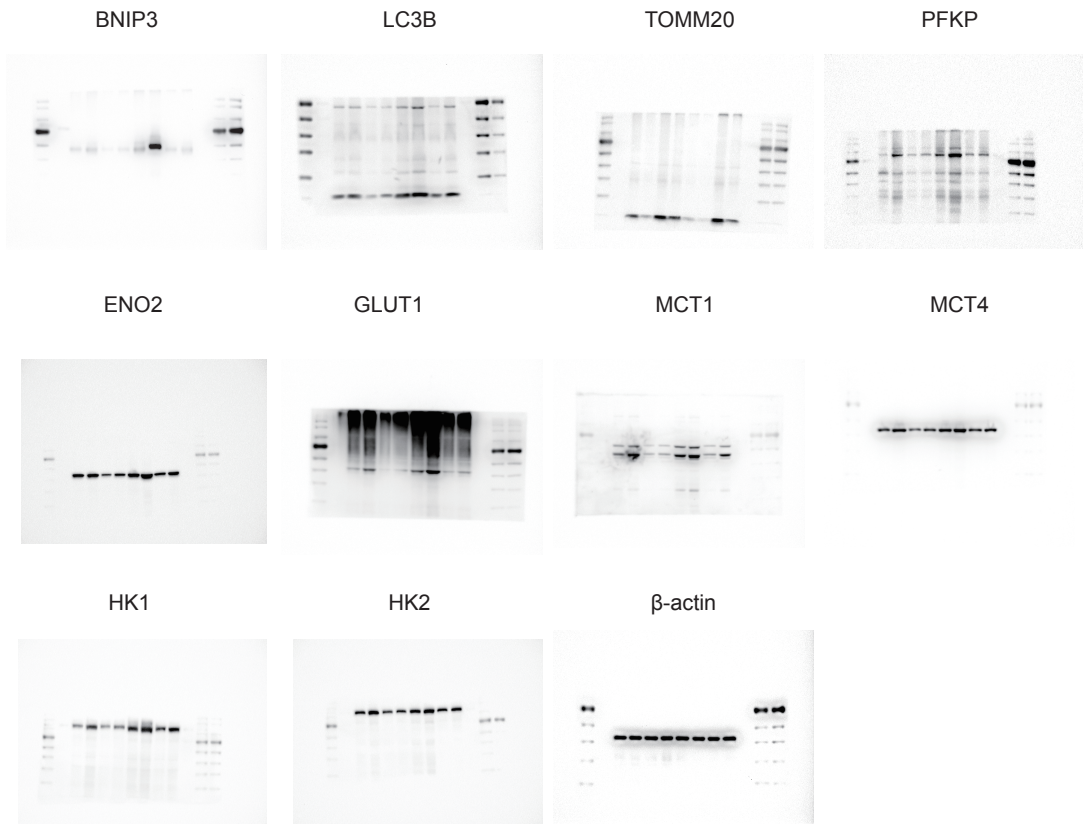

Full and Uncropped western blot for Fig. 5H

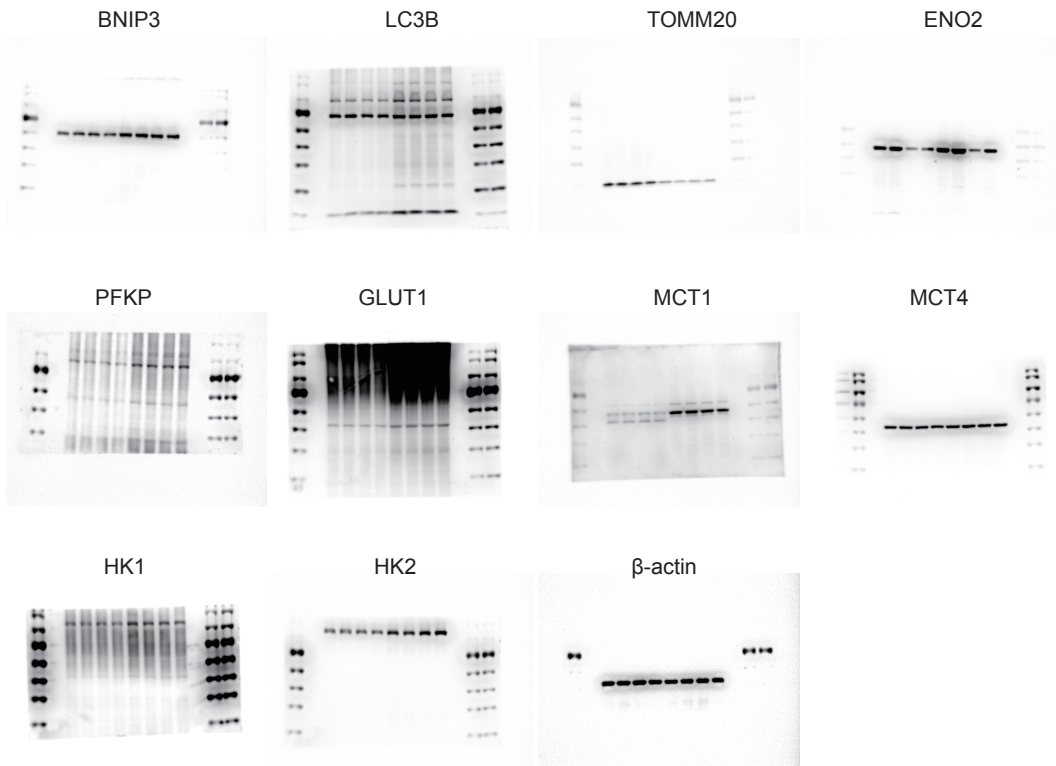

Full and Uncropped western blot for Fig. Supplemental Fig. S6E

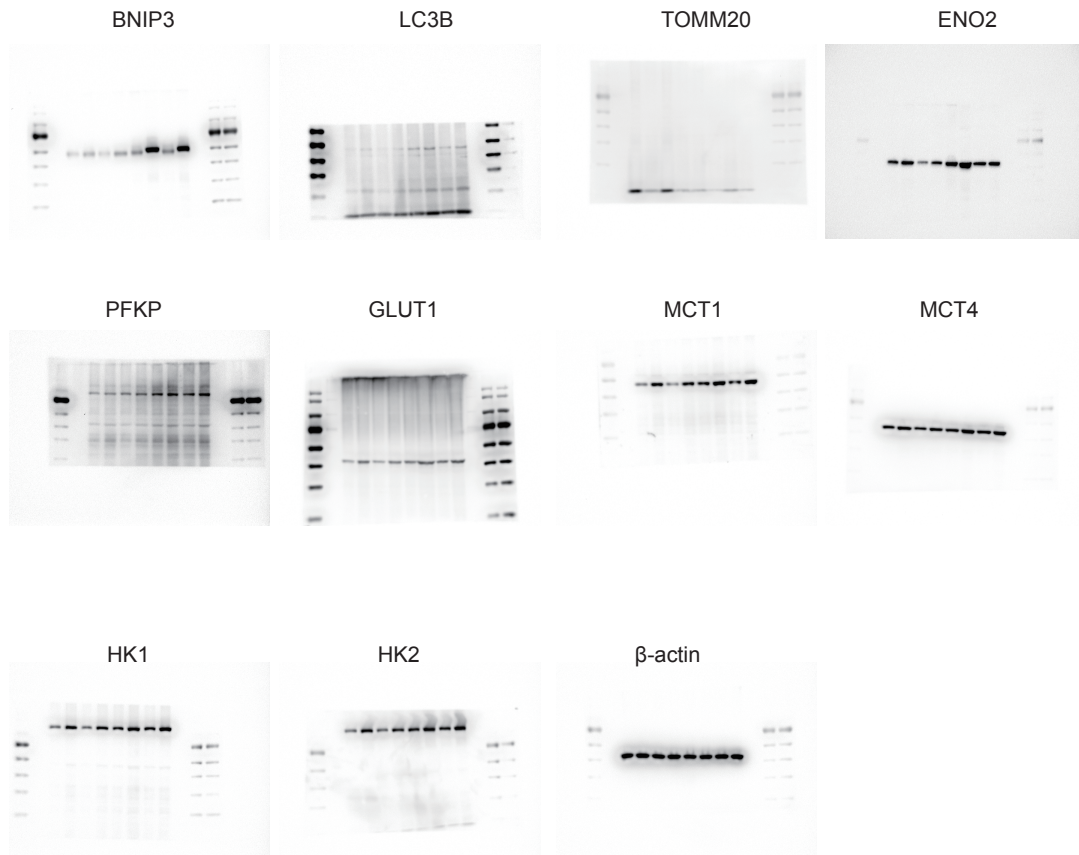

Full and Uncropped western blot for Fig. Supplemental Fig. S6G

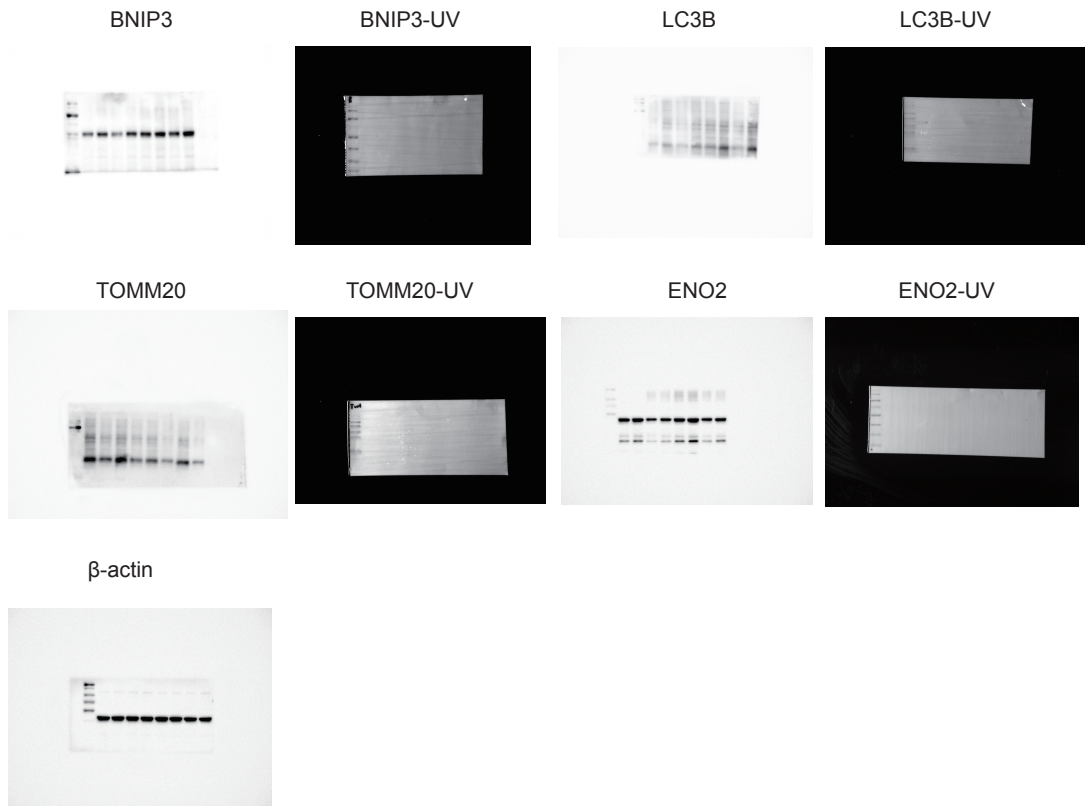

Full and Uncropped western blot for Fig. 6C

AMPK

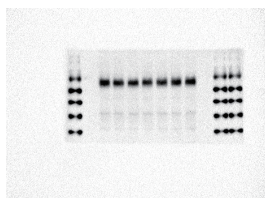

p-AMPK

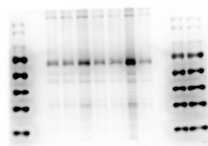

$\beta$ -actin

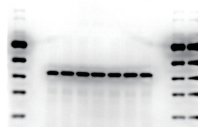

Full and Uncropped western blot for Fig. 6L

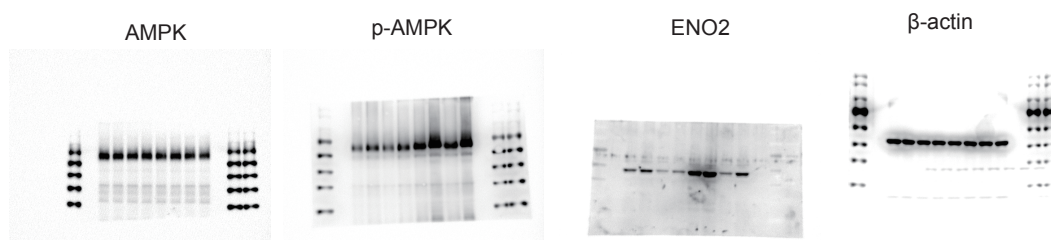



Full and Uncropped western blot for Fig. 6N

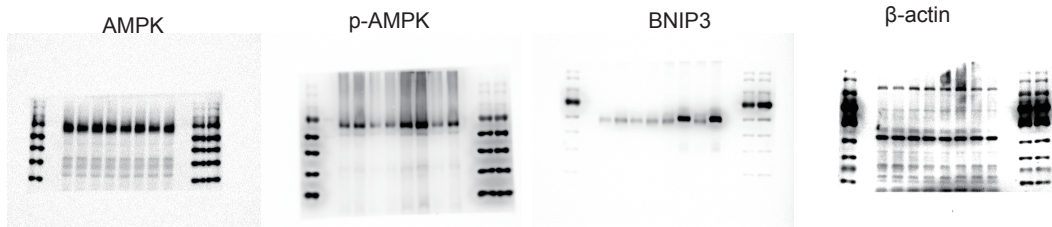

Full and Uncropped western blot for Fig. Supplemental Fig. S7A

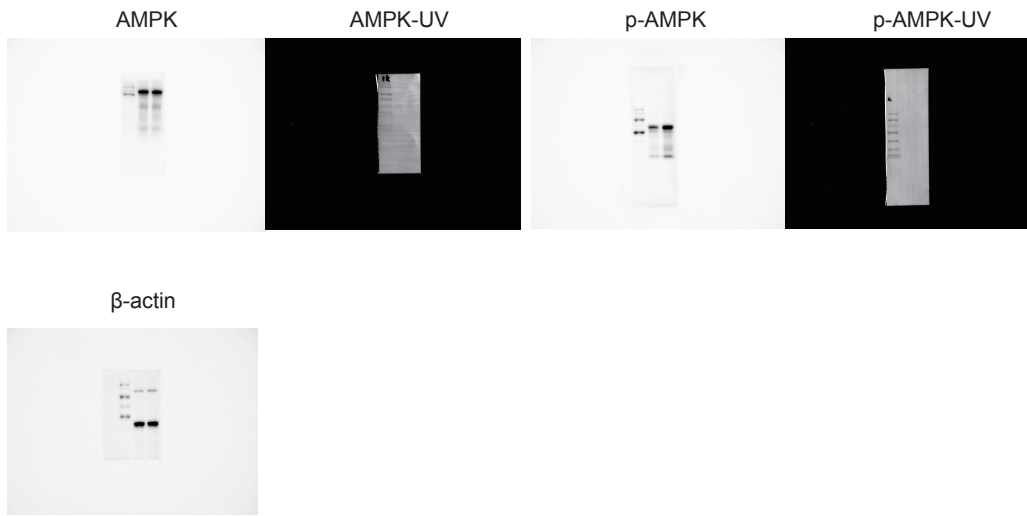

Full and Uncropped western blot for Fig. Supplemental Fig. S7I

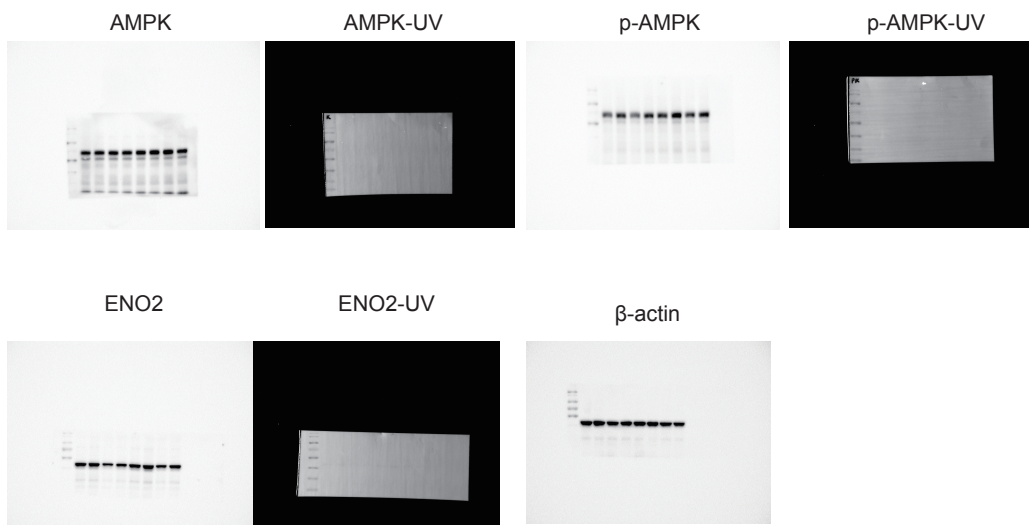

Full and Uncropped western blot for Fig. Supplemental Fig. S7N

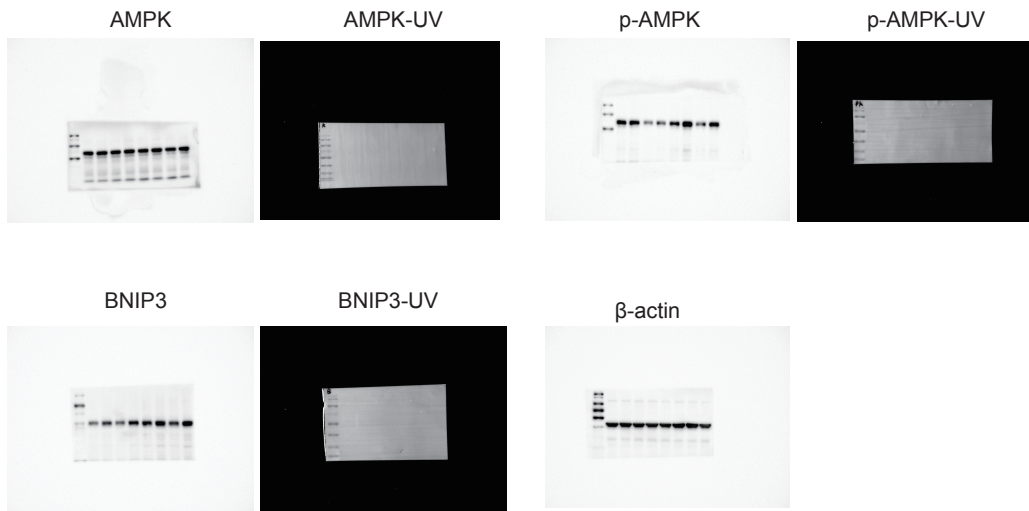

Supplement: 41419_2024_6870_MOESM15_ESM.pdf [file 41419_2024_6870_MOESM15_ESM.pdf]
